# Kilohertz *in vivo* imaging of neural activity

Jianglai Wu<sup>1, 2, 3</sup>, Yajie Liang<sup>3</sup>, Ching-Lung Hsu<sup>3</sup>, Mariya Chavarha<sup>4</sup>, Stephen W Evans<sup>4</sup>,  
Donqging Shi<sup>4</sup>, Michael Z Lin<sup>4</sup>, Kevin K Tsia<sup>2, \*</sup>, and Na Ji<sup>1, 3, 5\*</sup>

<sup>1</sup>Department of Physics, Department of Molecular and Cell Biology, Helen Wills Neuroscience Institute, University of California, Berkeley, CA, USA

<sup>2</sup>Department of Electrical and Electronic Engineering, The University of Hong Kong, Pokfulam Road, Hong Kong, China

<sup>3</sup>Janelia Research Campus, Howard Hughes Medical Institute, Ashburn, VA, USA

<sup>4</sup>Department of Bioengineering, Stanford University, Stanford, California, USA

<sup>5</sup>Molecular Biophysics and Integrated Bioimaging Division, Lawrence Berkeley National Laboratory, Berkeley, CA, USA

\*To whom correspondence should be addressed: [tsia@hku.hk](mailto:tsia@hku.hk), [jina@berkeley.edu](mailto:jina@berkeley.edu)

**Understanding information processing in the brain requires us to monitor neural activity *in vivo* at high spatiotemporal resolution. Using an ultrafast two-photon fluorescence microscope (2PFM) empowered by all-optical laser scanning, we imaged neural activity *in vivo* at 1,000 frames per second and submicron spatial resolution. This ultrafast imaging method enabled monitoring of electrical activity down to 300  $\mu\text{m}$  below the brain surface in head fixed awake mice.**

The ability to monitor neural signaling at synaptic and cellular resolution *in vivo* holds the key to dissecting the complex mechanisms of neural activity in intact brains of behaving animals. The past decade has witnessed a proliferation of genetically encoded fluorescence indicators that monitor diverse neural signaling events *in vivo*, including those sensing calcium transients, neurotransmitter and neuromodulator release, and membrane voltage [1]. Most popular are the calcium indicators (e.g., GCaMP6 [2]) and glutamate sensors (e.g., iGluSnFR [3]), with their success partly attributable to their slow temporal dynamics (e.g., rise and decay times of 100 – 1000's milliseconds for GCaMP6 and tens of milliseconds for iGluSnFR), which can be adequately sampled with conventional 2PFM systems. Indeed, using point scanning and near-infrared wavelength for fluorescence excitation, 2PFM can routinely image calcium activity hundreds of microns deep in opaque brains with submicron spatial resolution [4-6].

Imaging faster events, however, is more challenging. Indicators reporting membrane voltage, arguably the most direct and important measure of neural activity, have rise and decay

32 times measured in milliseconds. Too fast for the frame rate of conventional 2PFM to match, their  
33 *in vivo* imaging demonstrations were mostly carried out by widefield fluorescence microscopy with  
34 comparatively poor spatial resolution and limited to superficial depths of the brain [7, 8]. In other  
35 words, the capability of state-of-the-art indicators has outstripped our ability to image them at  
36 sufficiently high speed, especially at high spatial resolution and in large depths of scattering brains.

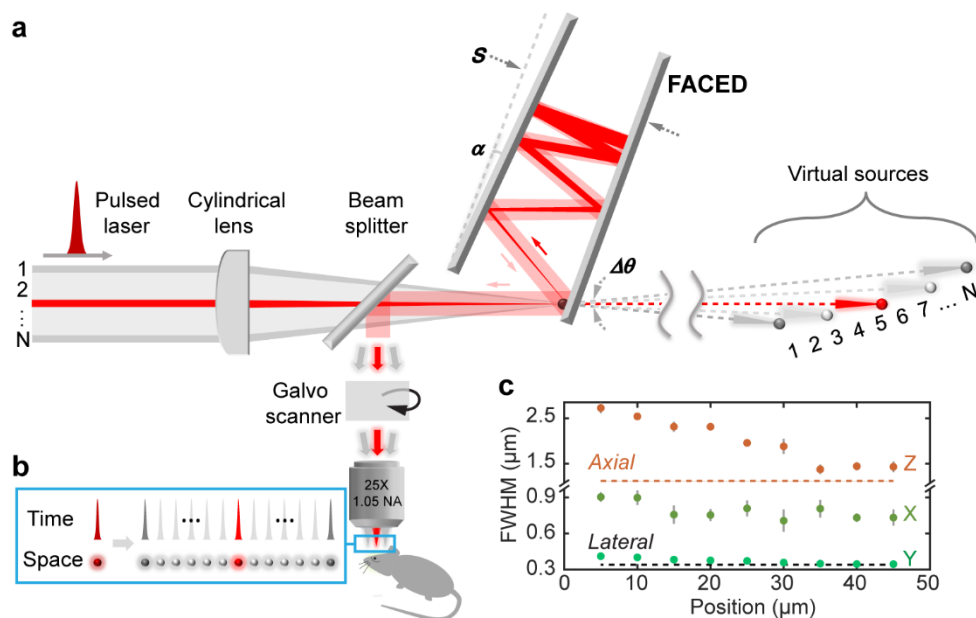

**Figure 1: Principles and resolution of a 2PFM with a FACED module.** (a) Schematic of a FACED microscope. A 1-MHz collimated femtosecond laser was focused into a nearly parallel mirror pair with a converging angle  $\Delta\theta$  by a cylindrical lens. After multiple reflections, the misalignment angle  $\alpha$  caused the beamlets to retroreflect (e.g., the red rays). Beamlets at different incidence angles (e.g., red versus gray rays) emerged with distinct propagation directions and temporal delays. Equivalently, the sequence of multiple beamlets ( $N = \Delta\theta/\alpha$ ) at the output of the FACED module can be treated as light emanating from an array of virtual sources. These beamlets were then coupled into a 2PFM, and formed (b) an array of spatially separated and temporally delayed foci at the focal plane of a microscope objective. (c) The focal spot sizes along the X/FACED, Y, and Z axes, measured from 200-nm-diameter fluorescent beads. Error bars show s.d. from 10 beads; dashed lines indicate the expected axial and lateral resolutions at 1.05 NA.

37 The imaging speed of conventional 2PFM is limited by laser scanners, such as  
38 galvanometric mirrors, to tens of frame per second (fps) [5, 6]. Its effective pixel dwell time  
39 (typically microseconds) is much longer than the ultimate limit imposed by the fluorescence  
40 lifetime (typically nanoseconds), below which substantial crosstalk of fluorescence from  
41 neighboring pixels can occur [9]. By leveraging an all-optical, passive laser scanner based on a  
42 concept termed free-space angular-chirp-enhanced delay (FACED) [10], here we demonstrated  
43 2PFM at 1,000 fps, with the pixel dwell time flexibly configured to reach the fluorescence lifetime.  
44 We applied it to ultrafast monitoring of calcium activity, glutamate release, and action potentials

45 with a variety of activity indicators. We showed that this ultrafast 2PFM can image both  
 46 spontaneous and sensory-evoked action potentials in awake mouse brains *in vivo*.

47 The principle of FACED was detailed previously (**Fig. 1a**) [10]. Briefly, a pulsed laser  
 48 beam was focused in 1D by a cylindrical lens and obtained a converging angle  $\Delta\theta$ . It was then  
 49 launched into a pair of almost parallel high-reflectivity mirrors with separation  $S$  and misalignment  
 50 angle  $\alpha$ . After multiple reflections by the mirrors, the laser beam/pulse was split into multiple  
 51 beamlets/subpulses ( $N = \Delta\theta/\alpha$ ) of distinct propagation directions and eventually retroreflected with  
 52 an inter-pulse temporal delay of  $2S/c$ , with  $c$  being the speed of light. After being relayed to enter  
 53 a microscope objective, this pulse train formed an array of spatially separated and temporally  
 54 delayed foci (**Fig. 1b**). In a fluorescent sample, they excited two-photon fluorescence in  
 55 succession, which could be detected by a photomultiplier tube, sampled at high speed, and  
 56 assigned to individual foci and image pixels. Effectively, this passive FACED module allows line  
 57 scanning at the repetition rate of the pulsed laser, typically MHz.

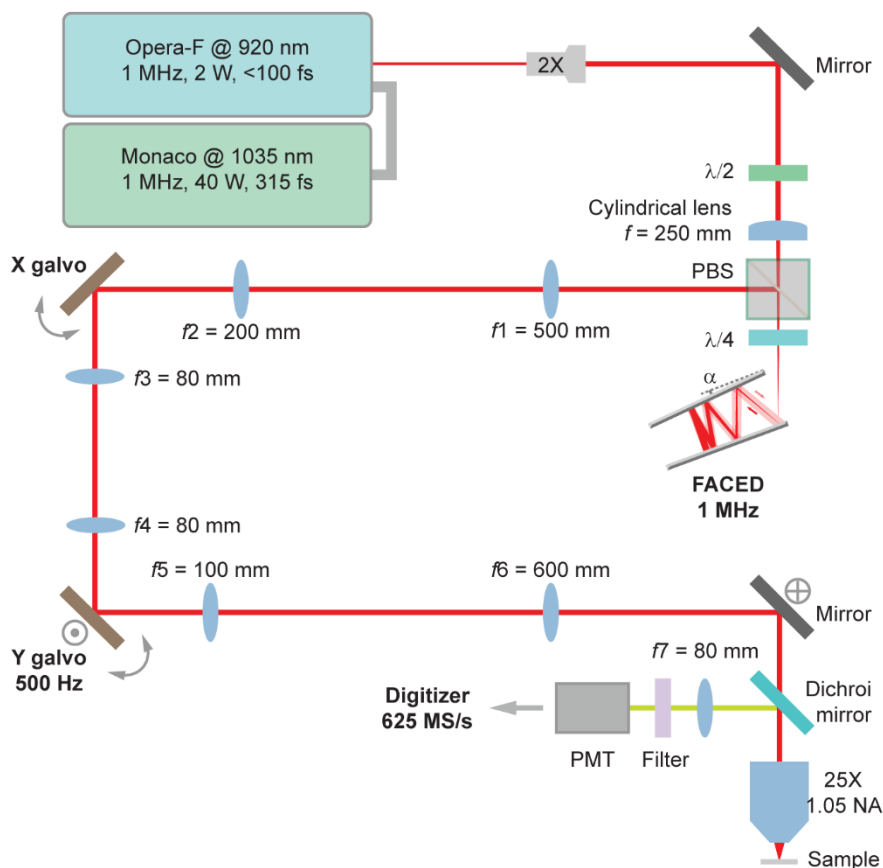

**Supplementary Figure 1: Optical layout of the FACED two-photon fluorescence microscope.** 2X: 2-fold beam expander;  $\lambda/2$ : Half-wave plate; PBS: polarizing beam splitter;  $\lambda/4$ : quarter-wave plate;  $\alpha$ : misalignment angle of the mirror pair; PMT: photomultiplier tube. The FACED module scans the foci along the X galvo direction. Note that the X galvo is deactivated for high-speed functional imaging.

58 In this work, we designed a FACED module to incorporate into a standard 2PFM upgraded  
 59 with a high-speed data acquisition system (625 MS/s) (**Supplementary Methods,**  
 60 **Supplementary Fig. 1**). With a laser system of 1 MHz repetition rate, our FACED module

61 scanned 80 pulsed foci spanning 50  $\mu\text{m}$  at 1 MHz. The inter-pulse interval was chosen to be 2 ns  
62 to reduce pixel crosstalk due to fluorescence lifetime and detector response time. We measured  
63 the full width at half maxima (FWHMs) of these foci by imaging 200-nm-diameter fluorescent  
64 beads. From the first to last, the foci were images of virtual sources formed after distinct numbers  
65 of mirror reflections and located at increasing distances away (**Fig. 1a**), with the more distant  
66 virtual sources leading to larger beam sizes at the back focal plane of the objective. As a result,  
67 the more temporally delayed pulses have smaller foci along both the lateral and axial directions  
68 (**Fig. 1c**). The beams filled the back focal plane more along the Y than X/FACED axis, and gave  
69 rise to  $\sim 0.8 \mu\text{m}$  (X) and  $\sim 0.35 \mu\text{m}$  (Y) lateral resolution, sufficient to resolve subcellular structures.  
70 With the FACED module providing 1 MHz line scan rate, we obtained a frame rate of 1,000 fps  
71 by scanning the Y galvanometer at 500 Hz and collecting data bidirectionally. The additional X  
72 galvanometer allowed us to tile the images to cover a larger field of view, if desired.

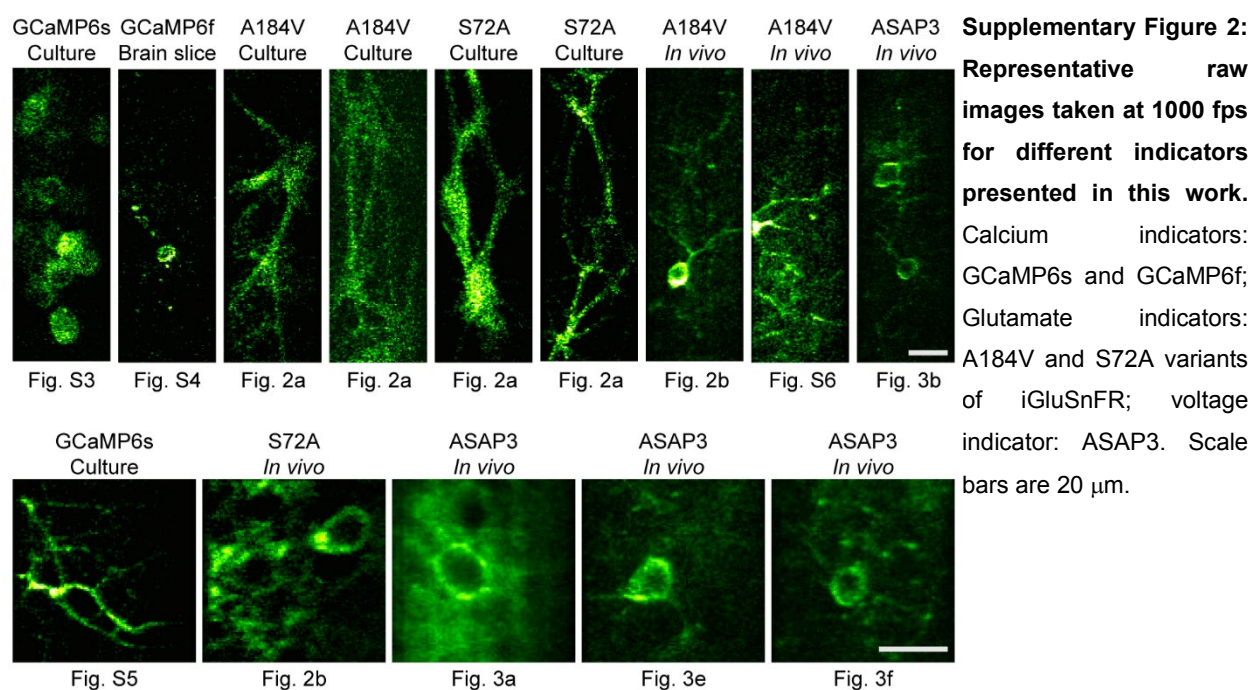

73 We first used the FACED 2PFM to image calcium dynamics using genetically encoded  
74 calcium indicators GCaMP6s and 6f [2]. At 1 kHz, morphological features were clearly resolved  
75 in individual images (see **Supplementary Fig. 2** for representative raw images taken at 1 kHz for  
76 all data presented in this manuscript). We reliably detected calcium transients in GCaMP6s  
77 cultured neurons (**Supplementary Fig. 3** and **Video 1**) and GCaMP6f acute mouse brain slices  
78 (**Supplementary Fig. 4** and **Video 2**) that were evoked by extracellular electric stimulation. Due  
79 to its high spatiotemporal resolution, we could clearly resolve neurites in cultured neurons, and in

80 one case, we recorded spontaneous calcium releases in neurites which then propagated at 25  
81  $\mu\text{m/s}$  across the dendrites (**supplementary Fig. 5 and video 3**).

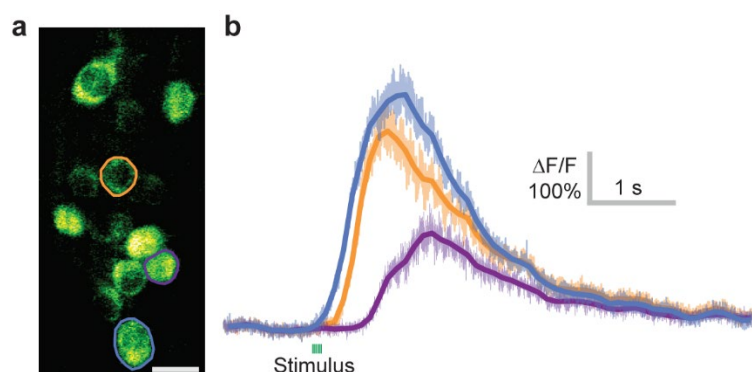

**Supplementary Figure 3: 1 kHz imaging of GCaMP6s-expressing cultured neurons.**

(a) Morphological image. (b) Calcium transients of 3 cells in (a) evoked by field electrode stimulation and recorded at 1,000 fps. Darker lines were 100-point boxcar averages of the raw traces to guide the eye. Scale bar: 20  $\mu\text{m}$ .

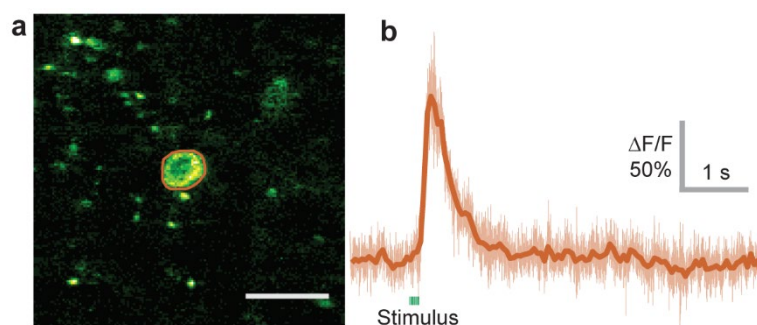

**Supplementary Figure 4: 1 kHz imaging of a GCaMP6f-expressing neuron in an acute brain slice.**

(a) Morphological image. (b) Calcium transient of the cell in (a) evoked by field electrode stimulation and recorded at 1,000 fps. Darker line was 50-point boxcar average of the raw trace to guide the eye. Scale bar: 20  $\mu\text{m}$ .

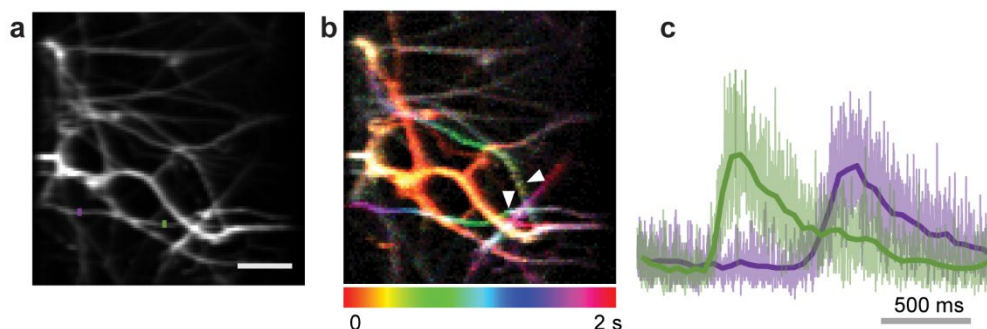

**Supplementary Figure 5: 1 kHz imaging of spontaneous calcium increases in neurites of GCaMP6s-expressing cultured neurons.**

(a) Mean intensity projection of 2,000 frames. (b) Temporal color coding of the 2,000 frames highlights the sites where calcium increases were initially observed (white arrowheads). (c) Calcium transients at the color masked positions in (a), indicating a calcium propagating speed of  $\sim 25 \mu\text{m/s}$ . Darker lines were 50-point boxcar averages of the raw traces to guide the eye. Scale bar: 10  $\mu\text{m}$ .

82 Clearly, the true power of FACED lies in imaging faster physiological events. Next, we  
83 imaged neurons labeled with variants A184V and S72A of the genetically encoded glutamate  
84 sensor iGluSnFR, which were expressed at cell membranes and had faster kinetics than the  
85 calcium indicators [11]. FACED 2PFM reliably reported glutamate release events evoked by field  
86 stimulation in cultured neurons (**Fig. 2a and Supplementary videos 4-7**), as well as spontaneous

87 glutamate release in L2/3 neurons in the primary visual cortex (V1) of head-fixed awake mice  
 88 (Fig.2b and Supplementary videos 8-9). Both in culture and *in vivo*, we observed faster

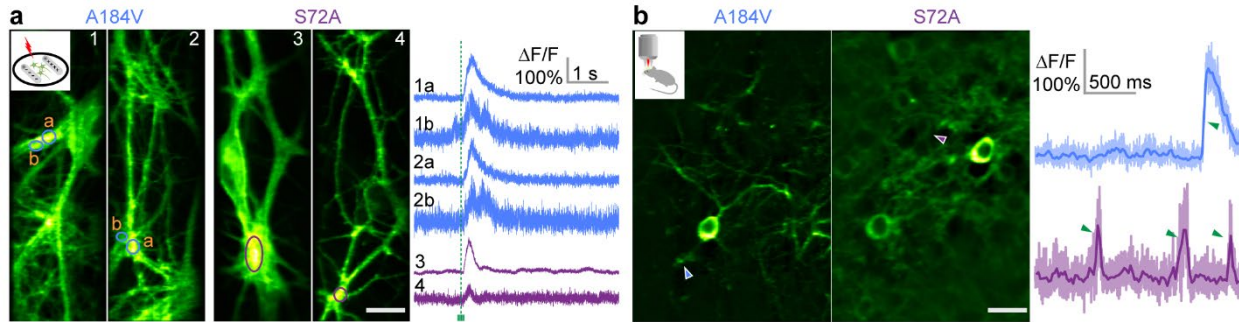

**Figure 2: 1 kHz imaging of genetically encoded glutamate indicator iGluSnFR variants in cultured neurons and in V1 of awake mice *in vivo*.** (a) (Left) mean intensity projections of cultured neurons expressing either the A184V or the S72A variants of iGluSnFR; (Right) transients associated with glutamate release triggered by extracellular electric stimulation (green dashed line) for structures labeled on the left. (b) (Left) Representative images of layer 2/3 neurons (depth: 150 – 250  $\mu\text{m}$ ) expressing either A184V or S72A in V1 of awake mice; (Right) Transients associated with spontaneous glutamate releases at sites indicated by arrowheads on the left. Here, darker lines were 20-point boxcar averages of the raw traces to guide the eye. Green arrowheads on the traces highlight the fast rising edge of the glutamate transients. Scale bars: 20  $\mu\text{m}$ . “Green hot” lookup table in ImageJ was applied to all images. Post-objective power: 25 – 30 mW for cultured neurons, 40 mW *in vivo*.

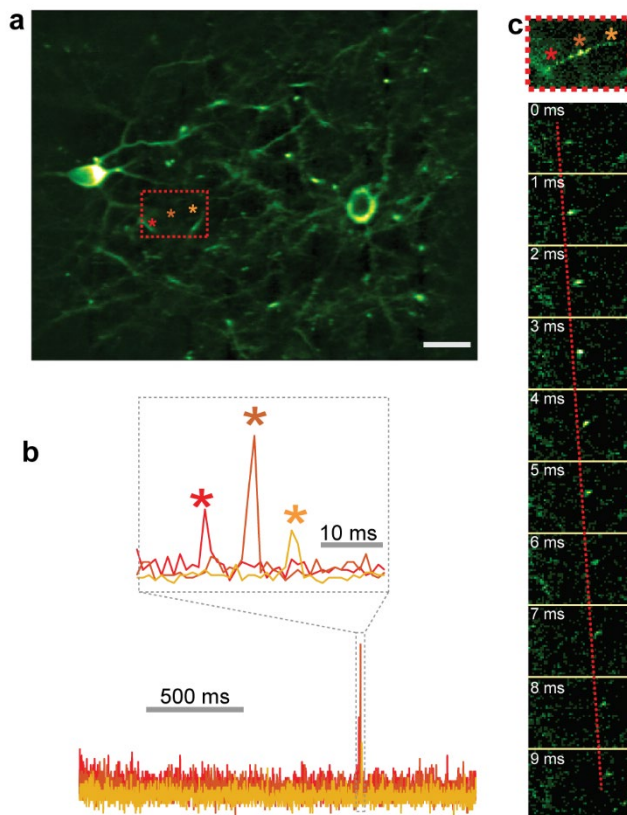

**Supplementary Figure 6: Tracking rapid movement of a fluorescent particle in the awake mouse brain *in vivo*.** (a) Morphological image of layer 2/3 neurons expressing the A184V variant of the glutamate sensor iGluSnFR in V1 of an awake mouse. (b) Time traces at the three pixels indicated by the three asterisks in (a). (c) Top panel shows the maximum intensity projection of the 10 image frames collected at 1 kHz of the boxed region in (a); bottom panel shows the 10 individual frames imaged at 1 ms interval. Scale bars: 20  $\mu\text{m}$ .

89 dynamics from the lower-affinity variant S72A than A184V, consistent with the sensor  
 90 characterizations by conventional 2PFM [11]. Imaging the brain *in vivo* at 1,000 fps, we also  
 91 observed rapid movements of fluorescent particles, which transited the field of view at  $\sim 1$  mm/s  
 92 (**Supplementary Fig. 6** and **Supplementary video 10**). We speculated that they were  
 93 macrophages containing fluorescent remnants of dead cells and moving rapidly with blood flow  
 94 in the vasculature. The ability of FACED 2PFM to capture such rapid event indicates that this  
 95 method can also be used to study rapid biological events associated with blood flow.

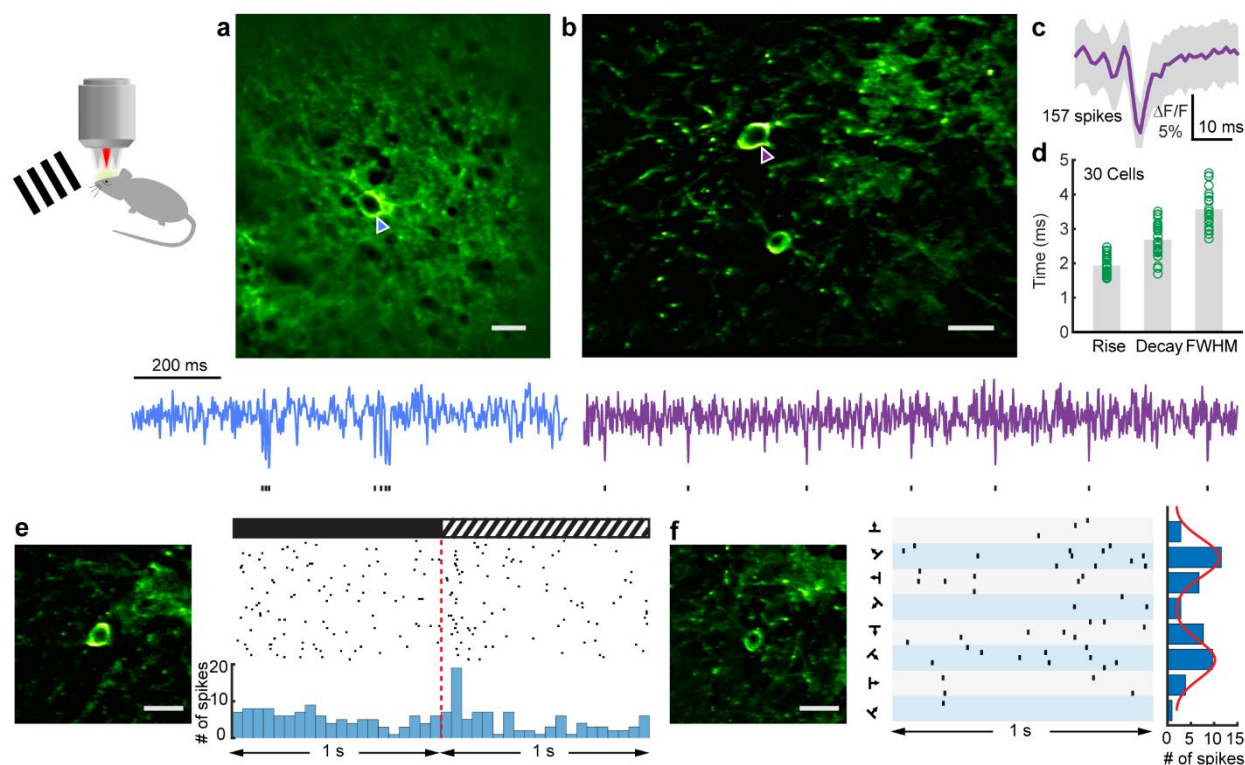

**Figure 3: 1 kHz imaging of voltage responses in V1 of awake mice.** (a, b) (Top) Representative images of L2/3 neurons in V1 either (a) densely or (b) sparsely labeled with ASAP3, a genetically encoded voltage indicators; (Bottom) Representative traces from neurons in (a) and (b), indicated by blue and purple arrow heads, respectively. Short black ticks below the traces denote optical spikes identified as downward deflections beyond three standard deviations (s.d.) of the trace. (c) Average of 157 optical spikes detected within 160 s from the neuron in (b); gray shaded area: s.d. (d) The rise time, decay time, and FWHM of the optical spikes measured from 30 neurons. (e) A L2/3 V1 neuron exhibiting both spontaneous (in the dark) and visually evoked (by drifting grating stimuli) voltage activity. (Left) morphology of the neuron; (Right, upper panel) raster plot of optical spikes over 80 trials (trials without detected spikes are not plotted); (Right, lower panel) histogram of spike counts within 50-ms bins. Dashed red line: stimulus onset. (f) A V1 neuron with orientation selectivity. (Left) morphology of the neuron; (Middle) raster plots showing all the optical spikes detected from the neuron during the presentation of gratings drifting in 8 different directions with 5 trials each; (Right) Histogram of total optical spikes for each grating stimulus, with a double Gaussian fit (red line). All imaged neurons were at a depth of 250 – 300  $\mu\text{m}$  below the brain surface. Scale bars: 20  $\mu\text{m}$ . “Green hot” lookup table in ImageJ was used for all images. Post-objective power: 50 mW.

96 Finally and most importantly, we imaged neurons expressing genetically encoded voltage  
97 indicator ASAP3 [12] in V1 of head-fixed awake mice. Among all voltage indicators, the ASAP  
98 family are currently the only ones that monitor voltage signal in brain slice or *in vivo* with 2PFM,  
99 albeit within very restricted field of views [12-14]. As an inverse sensor, ASAP3 reports membrane  
100 depolarizations and action potentials as downward deflections in fluorescence. The FACED  
101 microscope allowed us to detect spontaneous voltage signals corresponding to putative action  
102 potentials in both densely and sparsely labeled V1 neurons at depth down to 250 – 300  $\mu\text{m}$  below  
103 the brain surface (Figs. 3a, b).

104 We observed substantial signal decrease within the first 1 s of imaging (Supplementary  
105 Fig. 7). However, ASAP3 fluorescence recovered almost completely in images collected seconds  
106 later (Supplementary Fig. 8), allowing us to interrogate voltage responses from the same  
107 structures repeatedly. Despite photobleaching, downward signals corresponding to individual  
108 action potentials (“optical spikes”) could be easily detected in single trials with SNR > 3 (see  
109 Methods, Supplementary Fig. 9, Figs. 3a, b). In one neuron, we detected 157 action potentials  
110 within 160 s of recording (Fig. 3c). From the average fluorescence waveform of this (Fig. 3c) and  
111 29 other neurons (Supplementary Fig. 10), the rise time, decay time, and FWHM of ASAP3  
112 signal corresponding to single action potential were determined to be  $1.93 \pm 0.28$  ms,  $2.68 \pm 0.48$   
113 ms, and  $3.57 \pm 0.51$  ms, respectively (Fig. 3d). These characteristic time constants are consistent  
114 with those measured in an independent work [12].

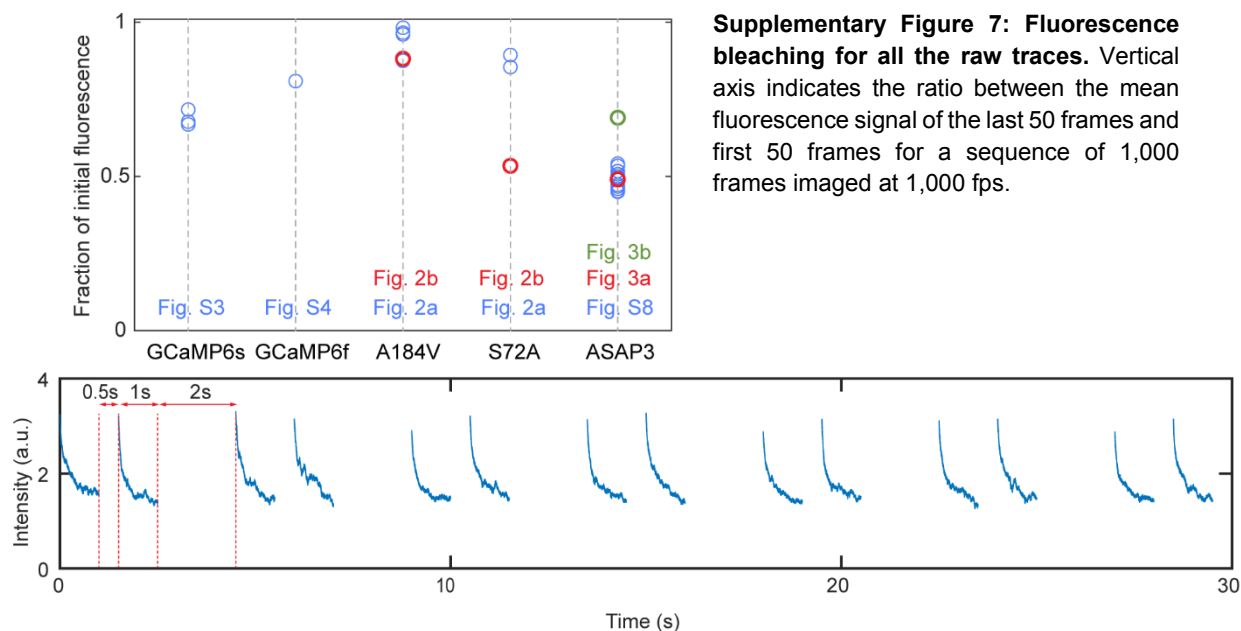

**Supplementary Figure 8: 14 raw fluorescence traces recorded within 30 seconds from the same cell in Fig. 3a.** Each trace was obtained from 1,000 frames recorded at 1,000 fps.



115 FACED 2PFM could also detect visually evoked spiking responses of neurons in V1 of  
116 awake mice. In one example (**Fig. 3e**), we detected action potentials from a V1 neuron, with the  
117 mouse being presented with a dark screen interleaved with drifting grating stimuli. This neuron  
118 was active both in the dark and during grating presentation, as was typical for V1 neurons  
119 measured electrophysiologically with cell-attached recording. Also consistent with  
120 electrophysiological recordings, there was an increase in firing rate following the onset of visual  
121 stimuli and with a latency of 50 – 100 ms, reflecting the beginning of grating-evoked activity in V1  
122 [15, 16]. We also recorded a neuron with orientation selectivity, and found a 5.5× higher firing rate  
123 for the preferred orientation than the null orientation, corresponding to an orientation selectivity  
124 index of 0.7 (**Fig. 3f**).

125 In summary, using an all-optical passive laser scanner based on FACED, we achieved  
126 ultrafast kilohertz imaging of neural activity with subcellular resolution in the mouse brain *in vivo*.  
127 The highest average power used in these experiments, 50 mW post objective, remains within the  
128 safe range and substantially below the threshold for heating-induced damages [17]. We did not  
129 observe signs of photodamages (e.g., blabbing of dendrites) in any of the samples tested,  
130 suggesting higher-order nonlinear photodamage processes to be also minimal. This is expected,  
131 because the power of individual beamlet post objective was less than 0.6 mW and overlaying  
132 tissue further reduced the actual focal energy as a result of scattering loss. Furthermore,  
133 subsequent excitation pulses arrived at the same sample positions after 1  $\mu$ s delay, providing  
134 ample time for the fluorophores to return from their photodamage-prone dark states back to their  
135 ground electronic state, a process that was shown to reduce photobleaching and increase  
136 fluorophore brightness [18].

137 Pushing the speed of two-photon fluorescence imaging to its fundamental limit, i.e. with a  
138 pixel dwell time similar to fluorescence lifetime, the FACED approach is readily compatible with  
139 conventional galvanometer-based 2PFMs and transform them to achieve kHz frame-rate imaging.  
140 Moreover, it follows conventional raster scanning strategy, requires minimal computational  
141 processing, and thus is immune to noise crosstalk effects observed in computation-based high-  
142 speed imaging techniques using, for example, compress sensing [19] or frequency multiplexing  
143 [20]. With existing sensors, FACED 2PFM have enough speed and sensitivity to detect calcium  
144 and glutamate transients from neuronal processes, and spiking events from cell bodies. Future  
145 improvement in brightness and sensitivity of voltage indicators should allow voltage signal to be

146 detected from subcellular compartments, which should allow FACED imaging to fulfill its full  
147 potential in interrogating the electrical activity in the brain *in vivo* at synaptic resolution.

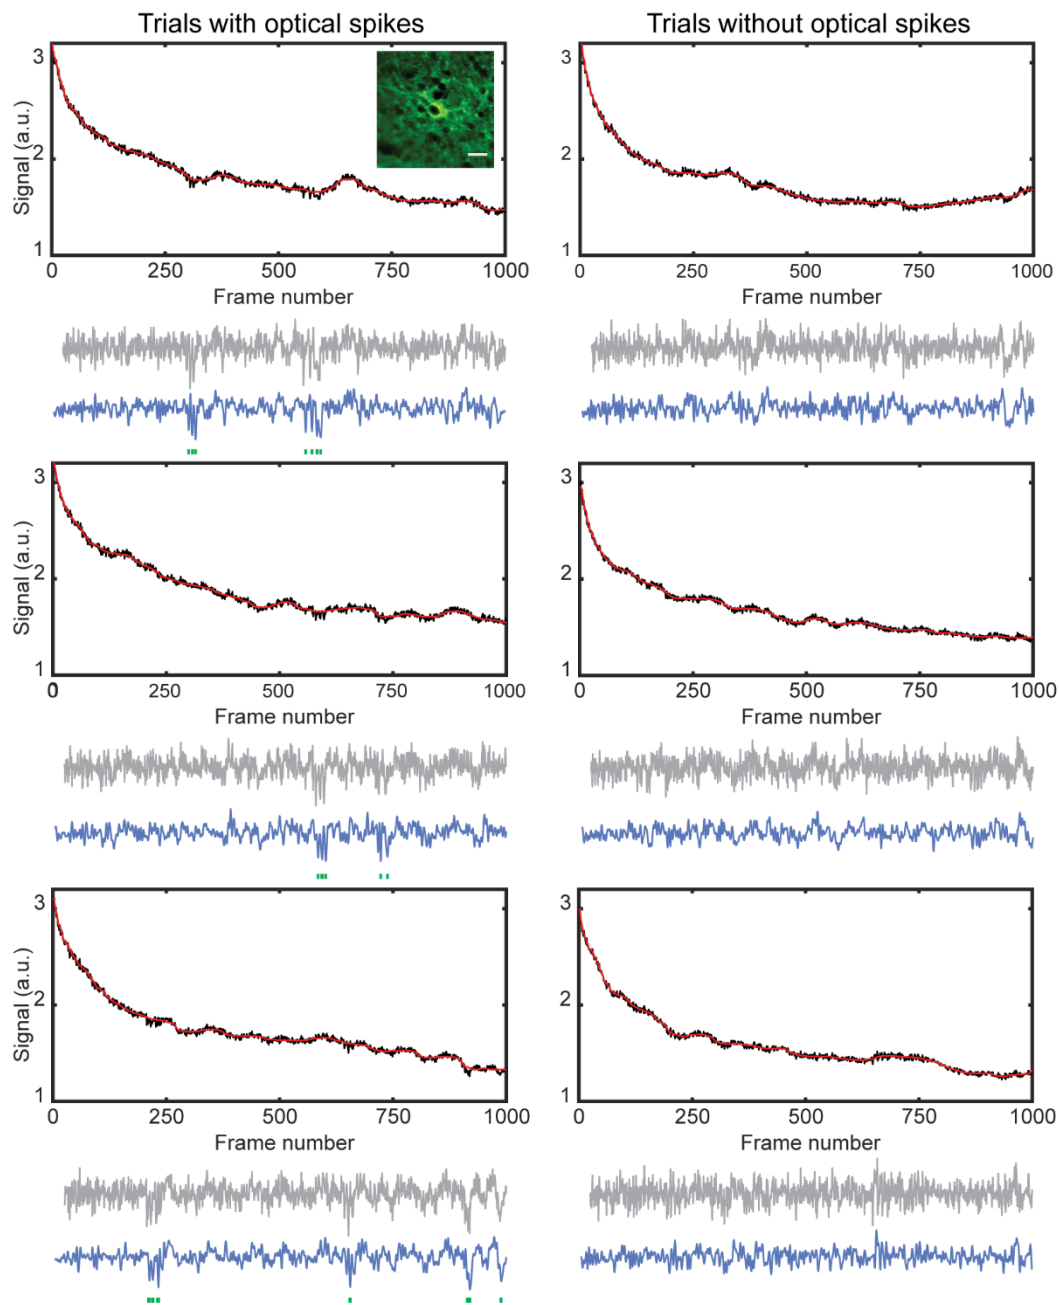

**Supplementary Figure 9: Data processing for *in vivo* voltage traces.** Left and right columns show three representative one-second voltage traces from the same neuron (as in Fig. 3a) with and without optical spikes detected, respectively. Inset: neuron image; scale bar: 20  $\mu\text{m}$ . (Top) Baseline fluorescence  $F$  (red) was obtained by low pass filtering (50 ms median filter) of the raw traces (black); (Middle)  $\Delta F/\sqrt{F}$  traces (fluorescence change to noise ratio, gray) was calculated and (bottom) subjected to a 200 Hz low pass Butterworth filter (blue). As ASAP3 is an inverse indicator, we define as optical spikes (green ticks) all downward deflections beyond three standard deviations of the trace.

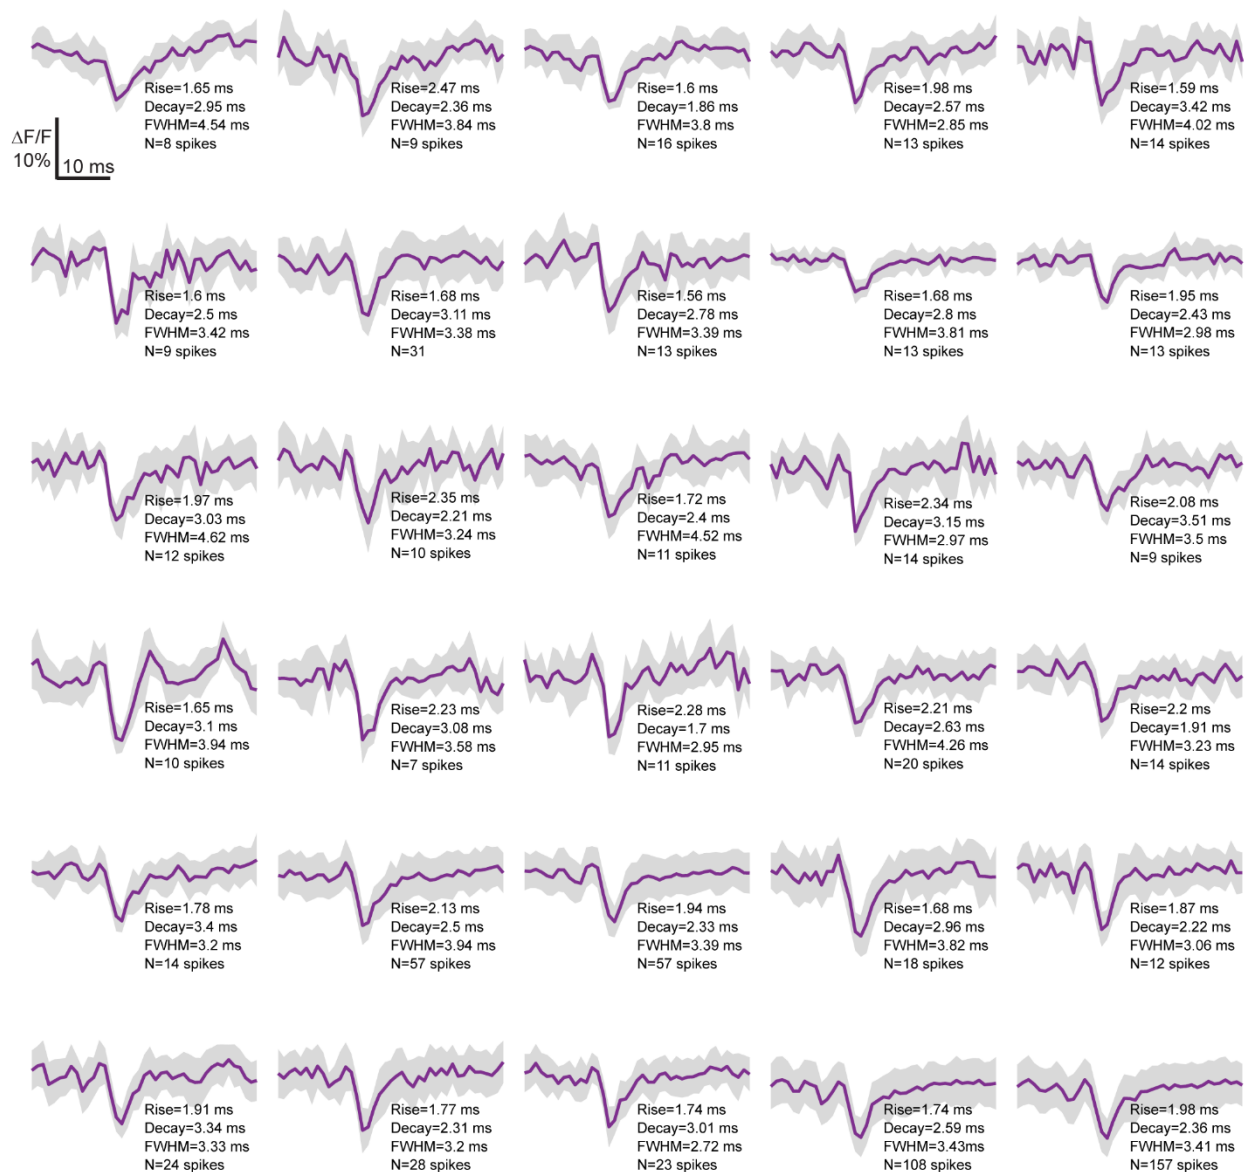

**Supplementary Figure 10: Voltage traces from 30 neurons.** Purple curves are the averaged voltage trace ( $\Delta F/F$ ) corresponding to an action potential from individual neurons. Gray shaded area: s.d. of the raw traces. The rise time, decay time, and FWHM of the averaged optical spike as well as total number of detected spikes are listed for each neuron.

## 148 METHODS

### 149 Animals

150 All animal experiments were conducted according to the National Institutes of Health guidelines  
 151 for animal research. Procedures and protocols on mice were approved by the Institutional Animal  
 152 Care and Use Committee at Janelia Research Campus, Howard Hughes Medical Institute.

## 153 **FACED two-photon fluorescence microscope (2PFM)**

154 The simplified schematic of the FACED 2PFM is shown in **Supplementary Fig. 1a**. The two-  
155 photon excitation laser source at 920 nm (1 MHz repetition rate, 2 W maximal average output  
156 power, < 100 fs pulse width) was generated by an optical parametric amplifier (Opera-F, Coherent  
157 Inc.) that was pumped by a fiber laser (Monaco 1035-40-40, Coherent Inc.). After dispersion  
158 compensation [21], the laser beam was expanded with a 2× beam expander (BE02M-B, Thorlabs).  
159 A cylindrical lens (LJ1267RM-B, Thorlabs) then one-dimensionally focused the beam into a nearly  
160 parallel mirror pair (reflectivity > 99.9% at 920 nm, fused silica substrate, 250 mm long and 20  
161 mm wide) with a separation of 300 mm. Because of the misalignment angle  $\alpha$ , all the light rays  
162 eventually reflected back, following a set of zig-zig paths determined by their angles of incidence.  
163 After the FACED module, the rays (e.g. red rays in **Fig. 1a**) subjected to the same number of  
164 reflections by the mirror pair formed a single beamlet, and can be considered as emanating from  
165 a virtual light source located far away from the mirror pair. In this work, the retroreflected light rays  
166 formed 80 beamlets, and had their propagation distances within the FACED module (or their  
167 distance from their respective virtual sources) monotonically increase from ~10 m to ~60 m. The  
168 power throughput of the FACED module was ~40%.

169 A polarization beam splitter (CCM1-PBS253, Thorlabs) in combination with a half-wave  
170 plate (AHWP05M-980, Thorlabs) and quarter-wave plate (AQWP05M-980, Thorlabs) were used  
171 to direct the spatially and temporally separated pulse trains into a 2PFM. A pair of singlet lenses  
172 (LA1380-B-ML and LA4102-B-ML, Thorlabs) was used to conjugate the focal plan of the  
173 cylindrical lens and the X galvo (6215H, Cambridge Technology); a pair of achromat doublets  
174 (AC508-080-B and AC508-080-B, Thorlabs) was then used to conjugate the X galvo to the Y galvo  
175 (6215H, Cambridge Technology); another pair of singlet lenses (014-0990 and 014-1310,  
176 OptoSigma) were used to conjugate the Y galvo to the back focal plane of a 25×/1.05 NA water-  
177 dipping objective lens (XLPLN25XWMP2, Olympus) that was mounted on a piezo stage (P-  
178 725K094, Physik Instrumente). By tuning the misalignment angle between the two mirrors, we  
179 generated a sequence of 80 focal spots extending 50  $\mu\text{m}$  along the X axis. With the separation  
180 between the two mirrors set at 300 mm, the time delay between adjacent pulses was 2 ns.

181 The two-photon excited fluorescence signal was collected by the same microscope  
182 objective, reflected by a dichroic mirror (FF665-Di02-25×36, Semrock), focused by a singlet lens  
183 (AC508-080-A, Thorlabs), and after passing through an emission filter (FF01-680/SP, Semrock),  
184 detected by a photomultiplier tube (PMT, H7422-40, Hamamatsu). The PMT signal was sampled

185 at 625 MS/s with a high speed digitizer and the data was transferred to and saved by a desktop  
 186 computer through a PCIe 16× interface.

187 With 1 MHz repetition rate of the laser, the FACED module gave rise to a line scan rate  
 188 of 1 MHz. Using the Y galvo to scan the foci along the direction orthogonal to the X/FACED axis  
 189 at 500 Hz, and collecting the data bidirectionally, we achieved a frame rate of 1,000 fps with an  
 190 effective image size of 80 × 900 pixels. 80 was given by the number of foci in the FACED axis  
 191 and 900 was the product of the effective frame time (1 ms frame time minus a 100 μs dead time  
 192 during mirror turns) and line scan rate. To increase the number of pixels in the FACED/X axis, X  
 193 galvo was stepped to tile FACED images and increase the field of view. In this work, all functional  
 194 imaging data were captured at 1,000 fps. For morphological imaging, we scanned the Y galvo at  
 195 50 Hz, resulting in a FACED imaging frame rate of 100 fps. (**Supplementary Table 1** listed all  
 196 the major imaging parameters used in this work).

**Supplementary Table 1:** Major imaging parameters used in this work.

| Specimen                      | Cultured neurons |      |         | Brain slice | Awake mice in vivo |                   |           |         |         |            |
|-------------------------------|------------------|------|---------|-------------|--------------------|-------------------|-----------|---------|---------|------------|
| Figure number                 | Fig. 2a          |      | Fig. S3 | Fig. S5     | Fig. S4            | Fig. 2b & Fig. S6 |           | Fig. 3a | Fig. 3b | Fig. 3e-3f |
| Indicator                     | A184V            | S72A | GCaMP6s |             | GCaMP6f            | A184V             | S72A      | ASAP3   |         |            |
| High speed functional imaging |                  |      |         |             |                    |                   |           |         |         |            |
| FACED frame time (ms)         | 1                |      |         |             |                    |                   |           |         |         |            |
| FOV along x-axis (μm)         | 50               |      |         |             |                    |                   |           |         |         |            |
| FOV along y-axis (μm)         | 150              |      | 50      | 150         | 50                 |                   | 150       | 50      |         |            |
| Morphological imaging         |                  |      |         |             |                    |                   |           |         |         |            |
| FACED frame time (ms)         | N/A              | 10   | N/A     | 10          |                    |                   |           |         |         |            |
| # of frames averaged          | N/A              | 1    | N/A     | 1           | 5                  |                   |           |         |         |            |
| FOV along x-axis (μm)         | N/A              | 50   | N/A     | 50          |                    |                   |           |         |         |            |
| FOV along y-axis (μm)         | N/A              | 150  | N/A     | 150         |                    | 200               | 150       |         |         |            |
| Imaging depth (μm)            | N/A              |      |         |             | 150 ~ 250          |                   | 250 ~ 300 |         |         |            |
| Laser power (mW)              | 25               | 30   | 20      |             | 40                 |                   | 50        |         |         |            |

197 The raw data from the digitizer was saved as 1D waveforms. The Gen-1 PCIe 16× slot  
 198 on the data acquisition computer had a maximal streaming rate of 250 Mb/s, which caused the  
 199 data to overflow the on-chip memory of the digitizer after 6 s of data acquisition and thus limited  
 200 the data collection to up to 6-s bouts. Upgrading the computer with Gen-3 PCIe 16× interface  
 201 should allow us to stream data continuously. At 1 kHz frame rate, each image frame had 625 ×  
 202 900 sampling points, with 100 × 900 data points sampling actual fluorescence excitation by the  
 203 FACED foci and used to reconstruct a single image. If desired, multi-line scans were averaged  
 204 to generate a single X line in the final image: for a Y-axis range of 150 μm, 3 line scans were

205 averaged to form a single row; for a Y-axis range of 50  $\mu\text{m}$ , 9 line scans are averaged. The final  
206 images were motion-registered with an iterative cross-correlation-based registration algorithm  
207 [22]. For morphological imaging, each FACED image frame had  $625 \times 9000$  sampling points ( $10\times$   
208 exposure time), and a  $10\times$  increase in line averaging to form the final image.

### 209 Analysis of activity data

210 We manually selected regions of interests (ROIs) from the averaged images of the registered  
211 image sequence. The mean fluorescent intensity within the ROIs was used to calculate the  $\Delta F/F$   
212 time traces, with  $F$  being the baseline fluorescence and  $\Delta F$  being the fluorescence change due to  
213 neural activity. In the calcium and glutamate indicator datasets, to calculate the  $\Delta F/F$ , we  
214 calculated the baseline fluorescence  $F$  by fitting the data points away from the transients (e.g. the  
215 first and last 1000 data points in Fig. 2a) with a single exponential function.

216 In the voltage indicator datasets, the ROI was selected to efficiently cover the cell  
217 membrane and a 45 – 55 ms median filter was applied to the raw trace to get the fluorescence  
218 baseline  $F$ . The calculated  $\Delta F$  (functional change) time trace is normalized to  $\sqrt{F}$  (Poisson noise)  
219 [23] and further subjected to a 200-Hz 8<sup>th</sup> order low-pass Butterworth filter. From the resulted  
220 traces, downward deflections beyond a threshold of  $3\sigma$  ( $\sigma$  is the standard deviation of the trace)  
221 was classified as an “optical spike” corresponding to a putative action potential (**Supplementary**  
222 **Fig. 9**). To quantify the temporal dynamics of the optical voltage response, we aligned the optical  
223 spikes from the same neuron at peak response, and measured the rise (10% to 90%), decay (90%  
224 to 10%) and FWHM time from their averaged traces.

225 For the neuron whose response exhibited orientation selectivity (**Fig. 3f**), we fit its spike  
226 responses with a bimodal Gaussian function [22],

$$227 \quad R(\theta) = R_{offset} + R_{pref} e^{-\frac{ang(\theta - \theta_{pref})^2}{2\sigma^2}} + R_{oppo} e^{-\frac{ang(\theta - \theta_{pref} + 180)^2}{2\sigma^2}},$$

228 in which  $R_{offset}$  is the offset,  $\theta_{pref}$  is the preferred grating drifting angle,  $R_{pref}$  and  $R_{oppo}$  are the  
229 responses at  $\theta_{pref}$  and  $\theta_{pref} - 180$  degree, respectively. The function  $ang(x) = \min(|x|, |x - 360|, |x +$   
230  $360|)$  wraps angular values onto the interval  $0^\circ$  to  $180^\circ$ . The orientation selectivity index was  
231 calculated as the ratio between  $R_{pref} - R_{ortho}$  and  $R_{pref} + R_{ortho}$  where  $R_{ortho}$  is the response of the  
232 neuron to the orientation orthogonal to the preferred orientation.

### 233 Preparation and electric stimulation of primary neuronal culture

234 Primary neuronal cultures from neonatal rat pups were prepared as described previously [24].  
235 AAV2/1.syn.GCaMP6s ( $1.8 \times 10^{13}$  GC/ml), AAV.DJ.syn.iGluSnFR.A184V ( $3 \times 10^{12}$  GC/ml), and  
236 AAV.DJ.syn.iGluSnFR.S72A ( $8.0 \times 10^{12}$  GC/ml) were used to label cultured neurons by adding 1  
237  $\mu$ l of viral solution to each well in 24 well plates with 300  $\mu$ l medium inside, respectively. After  
238 incubation overnight, 1 ml culture medium was added to each well. Neurons were imaged  
239 between 10 – 21 days post-transfection at room temperature in imaging buffer (145 mM NaCl,  
240 2.5 mM KCl, 10 mM glucose, 10 mM HEPES, 2 mM  $\text{CaCl}_2$ , 1 mM  $\text{MgCl}_2$ , pH7.4).

241 For electric stimulation, cultured neurons in imaging buffer were positioned between two parallel  
242 electrodes separated at  $\sim$ 10 mm. A stimulus isolator (NPIISO-01D100, ALA Scientific Instruments  
243 Inc.) and functional generator (AFG1022, Tektronix Inc.) was used to generate the electric field.  
244 For each stimulation, a train of 10 pulses (pulse duration: 1 ms; period: 12 ms; voltage: 50 V) was  
245 used to drive the neurons.

#### 246 **Preparation and electric stimulation of acute brain slices**

247 25-week-old male transgenic mice expressing GCaMP6f (scnn1a-TG3-cre x Ai93 x ACTB-tTA)  
248 [25, 26] were decapitated under deep isoflurane anesthesia, and the brain was transferred to an  
249 ice-cold dissection solution containing (in mM): 204.5 sucrose, 2.5 KCl, 1.25  $\text{NaH}_2\text{PO}_4$ , 28  
250  $\text{NaHCO}_3$ , 7 dextrose, 3 Na-pyruvate, 1 Na-ascorbate, 0.5  $\text{CaCl}_2$ , 7  $\text{MgCl}_2$  (pH 7.4, oxygenated  
251 with 95%  $\text{CO}_2$  and 5%  $\text{O}_2$ ). 350- $\mu$ m-thick coronal slices of the primary visual cortex (V1) were  
252 sectioned using a vibrating tissue slicer (Leica VT 1200S, Leica Microsystems, Wetzlar, Germany).  
253 The slices were then transferred to a suspended mesh within an incubation chamber filled with  
254 artificial cerebrospinal fluid (ACSF) containing (in mM): 125 NaCl, 2.5 KCl, 1.25  $\text{NaH}_2\text{PO}_4$ , 25  
255  $\text{NaHCO}_3$ , 25 dextrose, 1.3  $\text{CaCl}_2$ , 1  $\text{MgCl}_2$  (pH 7.4, oxygenated with 95%  $\text{CO}_2$  and 5%  $\text{O}_2$ ). After  
256 30 – 60 minutes of recovery at 35°C, the chamber was maintained at room temperature.

257 During imaging, slices were submerged in a recording chamber constantly perfused with  
258 oxygenated ACSF. A micropipette filled with ACSF were used for monopolar stimulation via a  
259 stimulus isolator (NPIISO-01D100, ALA Scientific Instruments Inc.) and a function generator  
260 (AFG1022, Tektronix Inc.). To provide extracellular stimulation, the stimulating electrode was  
261 placed in the proximity of the recorded cell, and a train of 10 pulses (pulse duration: 1 ms; period:  
262 12 ms; current: 300  $\mu$ A) was applied.

#### 263 **Mouse preparation for *in vivo* imaging**

264 Mice (females or males, >2-months-old) were housed in cages (in groups of 1 – 5 before surgeries  
265 and in pairs or single housed after) under reverse light cycle. Wild-type (Jackson Laboratories,  
266 Black 6, stock #:000664) as well as Gad2-IRES-cre (Jackson Laboratories, Gad2tm2 (cre) Zjh/J,  
267 stock #: 010802) mice were used.

268 Virus injection and cranial window implantation procedures have been described  
269 previously [22]. Briefly, mice were anaesthetized with isoflurane (1 – 2% by volume in O<sub>2</sub>) and  
270 given the analgesic buprenorphine (SC, 0.3 mg per kg of body weight). Animals were head fixed  
271 in a stereotaxic apparatus (Model 1900, David Kopf Instruments). A 3.5-mm diameter craniotomy  
272 was made over the left V1 with dura left intact. A glass pipette (Drummond Scientific Company)  
273 beveled at 45° with a 15 – 20 μm opening was back-filled with mineral oil. A fitted plunger  
274 controlled by a hydraulic manipulator (Narishige, MO10) was inserted into the pipette and used  
275 to load and slowly inject 30 nl viral solution into the brain (~200 – 400 μm below pia). 3 – 6 injection  
276 sites were chosen in the left V1 with 0.3 to 0.5 mm space between injection sites. The following  
277 viral vectors were used to label neurons with different sensors. Dense labeling with glutamate  
278 sensors: AAV.DJ.syn.iGluSnFR.A184V (3 × 10<sup>12</sup> GC/ml); AAV.DJ.syn.iGluSnFR.S72A (8.0 ×  
279 10<sup>12</sup> GC/ml); sparse labeling with glutamate sensors: AAV.DJ.syn.FLEX.iGluSnFR.A184V (2.8 ×  
280 10<sup>13</sup> GC/ml) 1:1 mixed with AAV2/1.syn.Cre (500 times diluted from 1.5 × 10<sup>13</sup> GC/ml);  
281 AAV.DJ.syn.FLEX.iGluSnFR.S72A (5.2 × 10<sup>12</sup> GC/ml) 1:1 mixed with AAV2/1.syn.Cre (500 times  
282 diluted from 1.5 × 10<sup>13</sup> GC/ml); dense labeling with the voltage sensor: AAV2/9.syn.ASAP3 (1.5  
283 × 10<sup>12</sup> GC/ml); sparse labeling with the voltage sensor: AAV2/9.CAG.FLEX.ASAP3 (6.7 × 10<sup>12</sup>  
284 GC/ml) 1:1 mixed with AAV2/1.syn.Cre (500 times diluted from 1.5 × 10<sup>13</sup> GC/ml). At the  
285 completion of viral injections, a glass window made of a single coverslip (Fisher Scientific No. 1.5)  
286 was embedded in the craniotomy and sealed in place with dental acrylic. A titanium head-post  
287 was then attached to the skull with cyanoacrylate glue and dental acrylic. *In vivo* imaging was  
288 carried out after at least two weeks of recovery with single or paired housing and habituation for  
289 head fixation. All imaging experiments were carried out on head-fixed awake mice.

### 290 **Visual stimulation in head-fixed awake mice**

291 Visual stimuli were presented by a liquid crystal display (7-inch diagonal and 1920 × 1200 pixels).  
292 The screen was positioned at 15 cm from the eye of the mice and orientated at ~40° to the long  
293 axis of the mice. Drifting sinusoidal gratings were presented for 1.5 s at 8 orientations (0° to 315°  
294 at 45° steps) in pseudorandom sequences. Between the grating stimulus, 3s dark screen were  
295 presented. Gratings had 100% contrast and 0.06 cycle per degree and drifted at 1.5 Hz. During



296 each 1.5 s stimulation period, a sequence of 1,000 images were recorded from 0 s to 1 s; during  
297 each 3 s dark adaptation period, a sequence of 1,000 images were recorded from 1.5 s to 2.5 s.  
298 A total of 5 or 10 trials were repeated for each stimulus.

### 299 **Data processing**

300 Unless stated otherwise, all images and data presented here were unprocessed raw images/data,  
301 without smoothing, denoising, or deconvolution. All data in the Supplementary Videos were  
302 collected at 1,000 fps, but were binned every 20 or 50 frames (no binning in **Supplementary**  
303 **Video 10** ) and saved at 20 binned fps for video output by Fiji [27], which was not capable of  
304 saving videos at 1,000 fps. “Green hot” lookup table in ImageJ was used for all images.

### 305 **ACKNOWLEDGEMENTS**

306 The authors thank Cristina Rodriguez for help with the laser system; Rongwen Lu for help with  
307 visual stimulation experiments; Guan Cao for providing cultured neuron samples; Jonathan  
308 Marvin, Loren Looger for providing glutamate sensors; and the Janelia JET team for designing  
309 and assembling the dispersion compensation unit. This work was supported by Howard Hughes  
310 Medical Institute (J.W., Y.L., C.-L.H., N.J.), and American Epilepsy Society predoctoral fellowship  
311 (M.C.); the China Scholarship Council Joint PhD Training Program (D.S.); Stanford Neuroscience  
312 PhD Program training grant 5T32MH020016 and the Post-9/11 GI Bill (S.W.E.); Research Grants  
313 Council of the Hong Kong Special Administrative Region of China (17209017, 17259316,  
314 17207715) (J.W., K.K.T.); and NIH BRAIN Initiative grants 1U01NS103464 (M.Z.L.),  
315 1RF1MH114105 (M.Z.L.), and 1UF1NS107696 (J.W., N.J.).

### 316 **CONTRIBUTIONS**

317 NJ conceived of the project; ML, KKT, and NJ supervised research; JW, KKT, and NJ designed  
318 FACED module; JW, YL, CLH collected calcium imaging data; JW and YL collected glutamate  
319 sensing data; MC created ASAP3; MC, SE, and DS characterized ASAP3 and ASAP3-expressing  
320 viruses; JW and YL collected voltage sensing data; JW analyzed data; JW and NJ wrote the  
321 manuscript with inputs from all authors.

### 322 **CONFLICT OF INTERESTS**

323 The authors declare the following competing interests: KKT and The University of Hong Kong  
324 have filed a U.S. patent application (14/733,454) that relates to the all-optical laser-scanning  
325 imaging methods.

326 **SUPPLEMENTARY VIDEO INFORMATION**

327 **Supplementary video 1: Imaging calcium transients at 1,000 fps in GCaMP6s-expressing**  
328 **cultured neurons evoked by extracellular electric stimulation.** Same data as in Supp. Fig. 3.  
329 The raw image sequence was binned every 50 frames, saved at 20 binned fps, and compressed  
330 for video output.

331 **Supplementary video 2: Imaging calcium transients at 1,000 fps in GCaMP6f-expressing**  
332 **neurons in acute mouse brain slices evoked by extracellular electric stimulation.** Same  
333 data as in Supp. Fig. 4. The raw image sequence was binned every 50 frames, saved at 20 binned  
334 fps, and compressed for video output.

335 **Supplementary video 3: Imaging spontaneous calcium release events at 1,000 fps in**  
336 **neurites of GCaMP6s-expressing cultured neurons.** Same data as in Supp. Fig. 5. The raw  
337 image sequence was binned every 20 frames, saved at 20 binned fps, and compressed for video  
338 output.

339 **Supplementary videos 4-5: Imaging glutamate transients at 1,000 fps in cultured neurons**  
340 **expressing A184V variant of iGluSnFR evoked by extracellular electric stimulation.** Same  
341 A184V data as in Fig. 2a. The raw image sequence was binned every 50 frames, saved at 20  
342 binned fps, and compressed for video output.

343 **Supplementary videos 6-7: Imaging glutamate transients at 1,000 fps in cultured neurons**  
344 **expressing S72A variant of iGluSnFR evoked by extracellular electric stimulation.** Same  
345 S72A data as in Fig. 2a. The raw image sequence was binned every 50 frames, saved at 20  
346 binned fps, and compressed for video output.

347 **Supplementary video 8: Imaging glutamate transients of layer 2/3 neurons expressing**  
348 **A184V variant of iGluSnFR in V1 of awake mice at 1,000 fps.** The white arrow points to the  
349 glutamate releasing site. Same A184V data as in Fig. 2b. The raw image sequence was binned  
350 every 20 frames, saved at 20 binned fps, and compressed for video output.

351 **Supplementary video 9: Imaging glutamate transients of layer 2/3 neurons expressing**  
352 **S72A variant of iGluSnFR in V1 of awake mice at 1,000 fps.** The white arrow points to the  
353 glutamate releasing site. Same S72A data as in Fig. 2b. The raw image sequence was binned  
354 every 20 frames, saved at 20 binned fps, and compressed for video output.

355 **Supplementary video 10: Imaging rapid movement of a fluorescent particle at 1,000 fps in**  
356 **the layer 2/3 of awake mouse brain *in vivo*.** Same data as in Supp. Fig. 6. A sequence of 50  
357 raw images recorded at 1,000 fps was saved at 20 fps and compressed for video output.

#### 358 REFERENCES:

- 359 1. Lin M.Z. & Schnitzer M.J. Genetically encoded indicators of neuronal activity. *Nat.*  
360 *Neurosci.* **19**, 1142–1153 (2016). DOI: <https://doi.org/10.1038/nn.4359>
- 361 2. Chen, T., et al. Ultrasensitive fluorescent proteins for imaging neuronal activity. *Nature* **499**,  
362 295–300 (2013). DOI: <https://doi.org/10.1038/nature12354>
- 363 3. Marvin J.S., et al. An optimized fluorescent probe for visualizing glutamate neurotransmission.  
364 *Nature Methods* **10**, 162–170 (2013). DOI: <https://doi.org/10.1038/nmeth.2333>
- 365 4. Helmchen F. & Denk W. Deep tissue two-photon microscopy. *Nat. Methods* **2**, 932–940  
366 (2005). DOI: <https://doi.org/10.1038/nmeth818>
- 367 5. Ji, N., Freeman, J. & Smith, S.L. Technologies for imaging neural activity in large volumes.  
368 *Nat. Neurosci.* **19**, 1154–1164 (2016). DOI: <https://doi.org/10.1038/nn.4358>
- 369 6. Yang, W. & Yuste, R. *In vivo* imaging of neural activity. *Nat. Methods* **14**, 349–359 (2017).  
370 DOI: <https://doi.org/10.1038/nmeth.4230>
- 371 7. Cao, G., et al. Genetically targeted optical electrophysiology in intact neural circuits.  
372 *Cell* **154**, 904–913 (2013). DOI: <https://doi.org/10.1016/j.cell.2013.07.027>
- 373 8. Gong, Y., et al. High-speed recording of neural spikes in awake mice and flies with a  
374 fluorescent voltage sensor. *Science* **350**, 1361–1366 (2015).  
375 DOI: <https://doi.org/10.1126/science.aab0810>
- 376 9. Chan, A.C.S., et al. Speed-dependent resolution analysis of ultrafast laser-scanning  
377 fluorescence microscopy. *J. Opt. Soc. Am. B* **31**, 755–764 (2014).  
378 DOI: <https://doi.org/10.1364/JOSAB.31.000755>
- 379 10. Wu, J.L., et al. Ultrafast laser-scanning time-stretch imaging at visible wavelengths. *Light Sci.*  
380 *Appl.* **6**, e16196 (2016). DOI: <https://doi.org/10.1038/lsa.2016.196>
- 381 11. Marvin, J.S., et al. Stability, affinity and chromatic variants of the glutamate sensor iGluSnFR.  
382 *Nat. Methods* **15**, 936–939 (2018). DOI: <https://doi.org/10.1038/s41592-018-0171-3>
- 383 12. Chavarha, M., et al. Fast two-photon volumetric imaging of an improved voltage indicator  
384 reveals electrical activity in deeply located neurons in the awake brain. Preprint at  
385 <https://www.biorxiv.org/content/early/2018/10/17/445064> (2018).
- 386 13. Yang, H. H., et al. Subcellular imaging of voltage and calcium signals reveals neural  
387 processing *in vivo*. *Cell* **166**, 245–257 (2016).

- 388 DOI: <https://doi.org/10.1016/j.cell.2016.05.031>
- 389 14. Chamberland, S., et al. Fast two-photon imaging of subcellular voltage dynamics in neuronal  
390 tissue with genetically encoded indicators. *eLife* **6**, e25690 (2017).  
391 DOI: <https://doi.org/10.7554/eLife.25690>
- 392 15. Resulaj, A., Ruediger, S., Olsen, S.R. & Scanziani, M. First spikes in visual cortex enable  
393 perceptual discrimination. *eLife* **7**, e34044 (2018).  
394 DOI: <https://doi.org/10.7554/eLife.34044>
- 395 16. Ma, W. p., et al. Visual representations by cortical somatostatin inhibitory neurons—selective  
396 but with weak and delayed responses. *J. Neurosci.* **30**, 14371–14379 (2010).  
397 DOI: <https://doi.org/10.1523/JNEUROSCI.3248-10.2010>
- 398 17. Podgorski, K. & Ranganathan, G. Brain heating induced by near-infrared lasers during  
399 multiphoton microscopy. *J. Neurophysiol.* **116**, 1012–1023 (2016).  
400 DOI: <https://doi.org/10.1152/jn.00275.2016>
- 401 18. Donnert, G., Eggeling, C. & Hell, S. W. Major signal increase in fluorescence microscopy  
402 through dark-state relaxation. *Nat. Methods* **4**, 81–86 (2007).  
403 DOI: <https://doi.org/10.1038/nmeth986>
- 404 19. Kazemipour, A., et al. Kilohertz frame-rate two-photon tomography. Preprint at  
405 <https://www.biorxiv.org/content/early/2018/06/28/357269> (2018).
- 406 20. Tsyboulski, D., Orlova, N., Ledochowitsch, P. & Saggau P. Two-photon frequency division  
407 multiplexing for functional *in vivo* imaging: a feasibility study. Preprint at  
408 <https://www.biorxiv.org/content/early/2018/08/31/405118> (2018).
- 409 21. Chauhan, V., Bowlan, P., Cohen, J. & Trebino R. Single-diffraction-grating and prism pulse  
410 compressors. *App. Optics* **4**, 619–624 (2010).  
411 DOI: <https://doi.org/10.1364/JOSAB.27.000619>
- 412 22. Lu, R., et al. Video-rate volumetric functional imaging of the brain at synaptic resolution. *Nat.*  
413 *Neurosci.* **20**, 620–628 (2017). DOI: <https://doi.org/10.1038/nn.4516>
- 414 23. Wilt, B.A., Fitzgerald, J.E. & Schnitzer, M. J. Photon shot noise limits on optical detection  
415 of neuronal spikes and estimation of spike timing. *Biophys. J.* **104**, 51–62 (2013). DOI:  
416 <https://doi.org/10.1016/j.bpj.2012.07.058>
- 417 24. Wardill, T.J., *et al.* A neuron-based screening platform for optimizing genetically-encoded  
418 calcium indicators. *PLoS One* **8**, e77728 (2013).  
419 DOI: <https://doi.org/10.1371/journal.pone.0077728>
- 420 25. Madisen, L., *et al.* Transgenic mice for intersectional targeting of neural sensors and effectors  
421 with high specificity and performance. *Neuron* **85**, 942–958 (2015).

422 DOI: <https://doi.org/10.1016/j.neuron.2015.02.022>

423 26. Madisen, L., *et al.* A robust and high-throughput Cre reporting and characterization system for  
424 the whole mouse brain. *Nat. Neurosci.* **13**, 133–140 (2010).

425 DOI: <https://doi.org/10.1038/nn.2467>

426 27. Schindelin, J., *et al.* Fiji: an open-source platform for biological-image analysis. *Nat. Methods*  
427 **9**, 676–682 (2012). DOI: <https://doi.org/10.1038/nmeth.2019>
